# Supplementary material for: The Discovery, Enzymatic Characterization and Functional Analysis of a Newly Isolated Chitinase from Marine-Derived Fungus Aspergillus fumigatus df347
Source: MDPI journal article supplement (doi:10.3390/md20080520), 2022-08-15
Supplement: s1 [file s1]

# The Discovery, Enzymatic Characterization and Functional Analysis of a Newly Isolated Chitinase from Marine-Derived Fungus *Aspergillus fumigatus* df347

Ya-Li Wu <sup>1,2,†</sup>, Sheng Wang <sup>3,†</sup>, Deng-Feng Yang <sup>2</sup>, Li-Yan Yang <sup>2</sup>, Qing-Yan Wang <sup>2</sup>, Jun Yu <sup>2,4</sup>, Nan Li <sup>1,\*</sup> and Li-Xia Pan <sup>2,\*</sup>

<sup>1</sup> College of Life Science and Technology, Guangxi University, Nanning 530004, China

<sup>2</sup> State Key Laboratory of Non-Food Biomass and Enzyme Technology, Guangxi Key Laboratory of Marine Natural Products and Combinatorial Biosynthesis Chemistry, Guangxi Academy of Sciences, 98 Daling Road, Nanning 530007, China

<sup>3</sup> Nanning Pangbo Biological Engineering Co., Ltd., Nanning 530004, China

<sup>4</sup> College of Food and Quality Engineering, Nanning University, Nanning 530200, China

\* Correspondence: linan97690612@163.com (N.L.); panlixia@gxas.cn (L.-X.P.); Tel.: +86-1350-7868-042 (N.L.); +86-1376-8513-581 (L.-X.P.)

† These authors contributed equally to this work.

# Contents

|                                                                                                                                                                            |   |
|----------------------------------------------------------------------------------------------------------------------------------------------------------------------------|---|
| Figure S1. Phylogenetic tree analysis of <i>AfChi28</i> .....                                                                                                              | 3 |
| Figure S2. Sequence and structural analysis of domains of <i>AfChi28</i> .....                                                                                             | 4 |
| Figure S3. Agarose gel verification diagram after restriction digestion .....                                                                                              | 4 |
| Figure S4. SDS-PAGE analysis of <i>AfChi28</i> .....                                                                                                                       | 5 |
| Figure S5. TLC of colloidal chitin hydrolysates produced by <i>AfChi28</i> . ....                                                                                          | 5 |
| Figure S6. The degree of polymerization of the hydrolysis products after 6 h of reaction<br>of <i>AfChi28</i> with colloidal chitin were analyzed by Q Exactive LC-MS..... | 6 |
| Table S1. Kinetic parameters of <i>AfChi28</i> towards colloidal chitin.....                                                                                               | 7 |

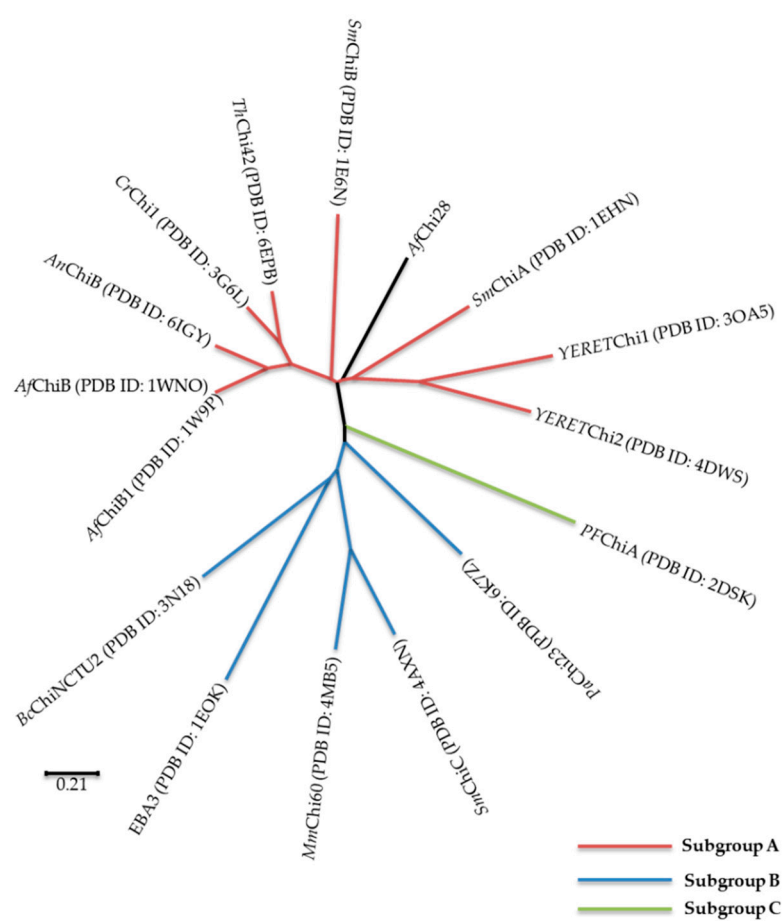

**Figure S1.** Phylogenetic tree analysis of *AfChi28* and 15 different protein sequences with high identities in Protein Data Bank. The PDB ID also show in the figure. The Gene Bank number of *Afchi28* from NCBI database is OK 302920.

Tree scale: 0.21 substitutions per nucleotide position.

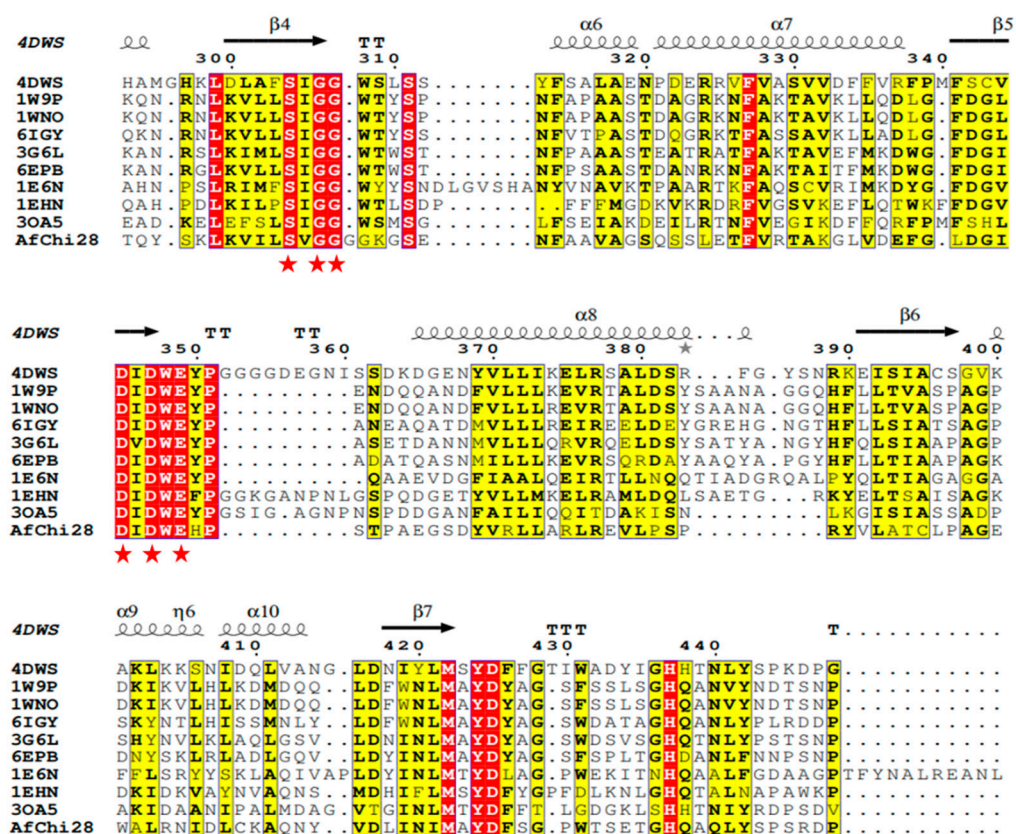

**Figure S2.** Sequence and structural analysis of domains of *AfChi28*. Sequence alignment analysis of *AfChi28* with other subgroup A chitinases, respectively. The different sources of chitinase are indicated by their corresponding Protein Data Bank ID. The motif that was predicted to be associated with substrate specificity is indicated by red star (★).

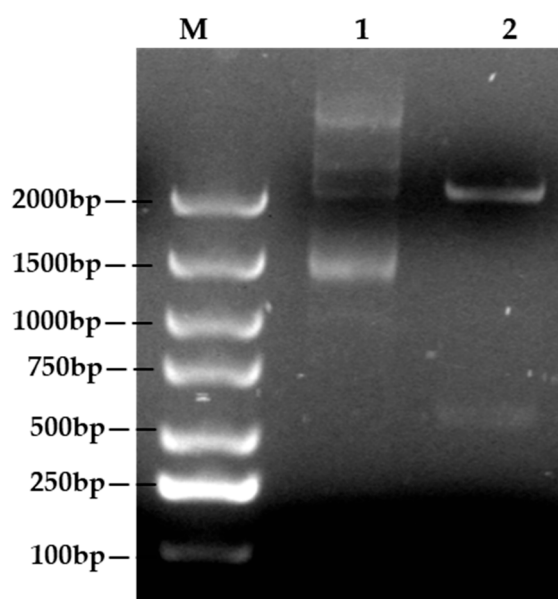

**Figure S3.** Agarose gel verification diagram after restriction digestion; Lane M: DNA Marker; Lane 1: pET28a (+)- *Afchi28* (1G2800); Lane 2: Target gene.

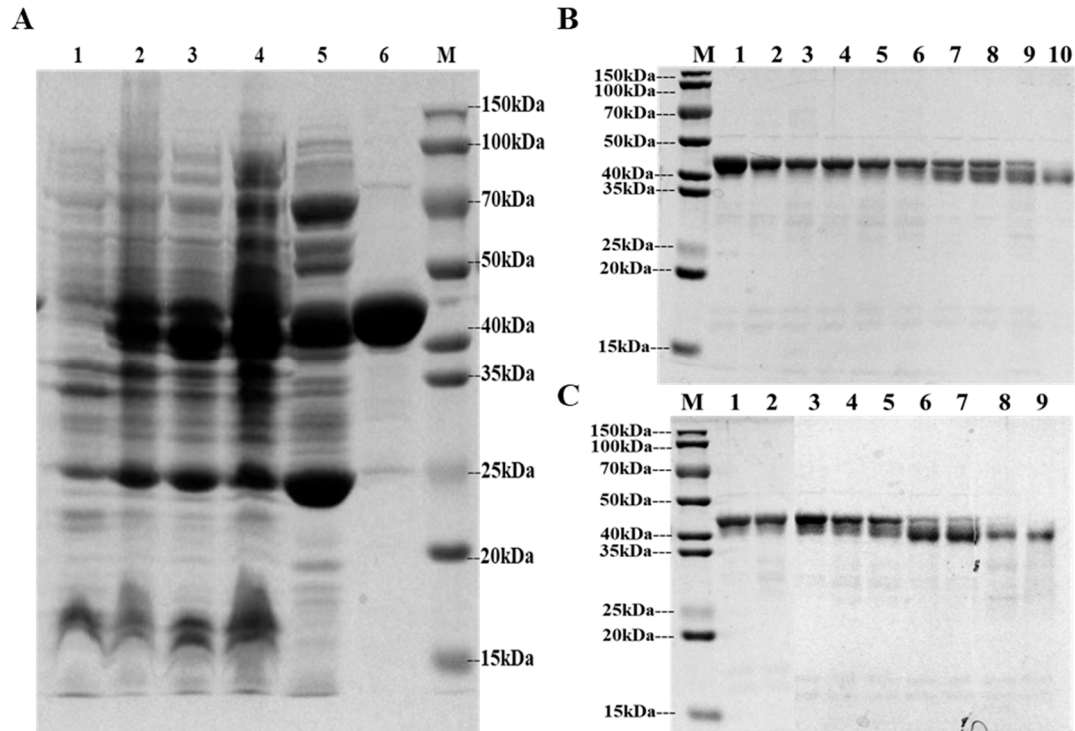

**Figure S4.** SDS-PAGE analysis of *AfChi28*. Lane M: low molecular weight protein standards (150, 100, 70, 50, 40, 35, 25 and 15 kDa). (A) SDS-PAGE analysis of *AfChi28* protein expression and purification. Lane 1, Cell lysates; Lane 2, The crude enzyme in the supernatant of lysates; Lane 3, the flow through; Lane 4 and 5, the flow through of impurity protein eluted by 50 mM phosphate buffer; Lane 6, purified protein eluate. (B) SDS-PAGE analysis of the stability of purified *AfChi28* protein at 30 °C incubation. Lane 1 is for the purified *AfChi28* with the concentration was 0.242 mg/ml. Lane 2 to lane 10 was supernatants collected after different incubation time (from left to right: 2 h, 4 h, 6 h, 8 h, 12 h, 16 h, 24 h, 36 h and 48 h). (C) SDS-PAGE analysis of the stability of purified *AfChi28* protein at 45 °C incubation. Lane 1 to lane 9 was supernatants collected after different incubation times (from left to right: 2 h, 4 h, 6 h, 8 h, 12 h, 16 h, 24 h, 36 h and 48 h).

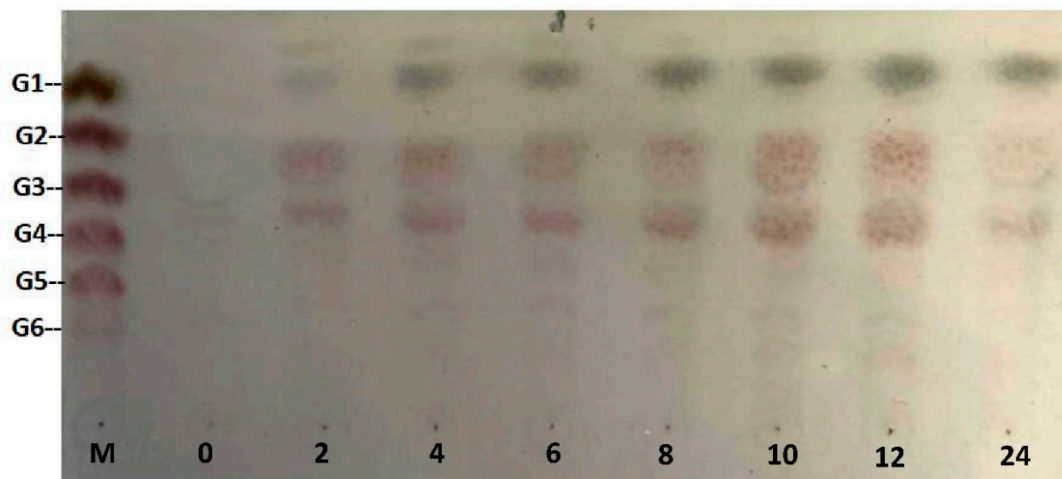

**Figure S5.** TLC of colloidal chitin hydrolysates produced by *AfChi28*. Lane M, the standard of (GlcNAc)<sub>n</sub> (n = 1-6); Lane 0, control of chitin; Lane 2 to lane 24 represent the products collected at different degradation times respectively (different degradation times from left to right: 2h, 4h, 6h, 8h, 10h, 12h and 24h).

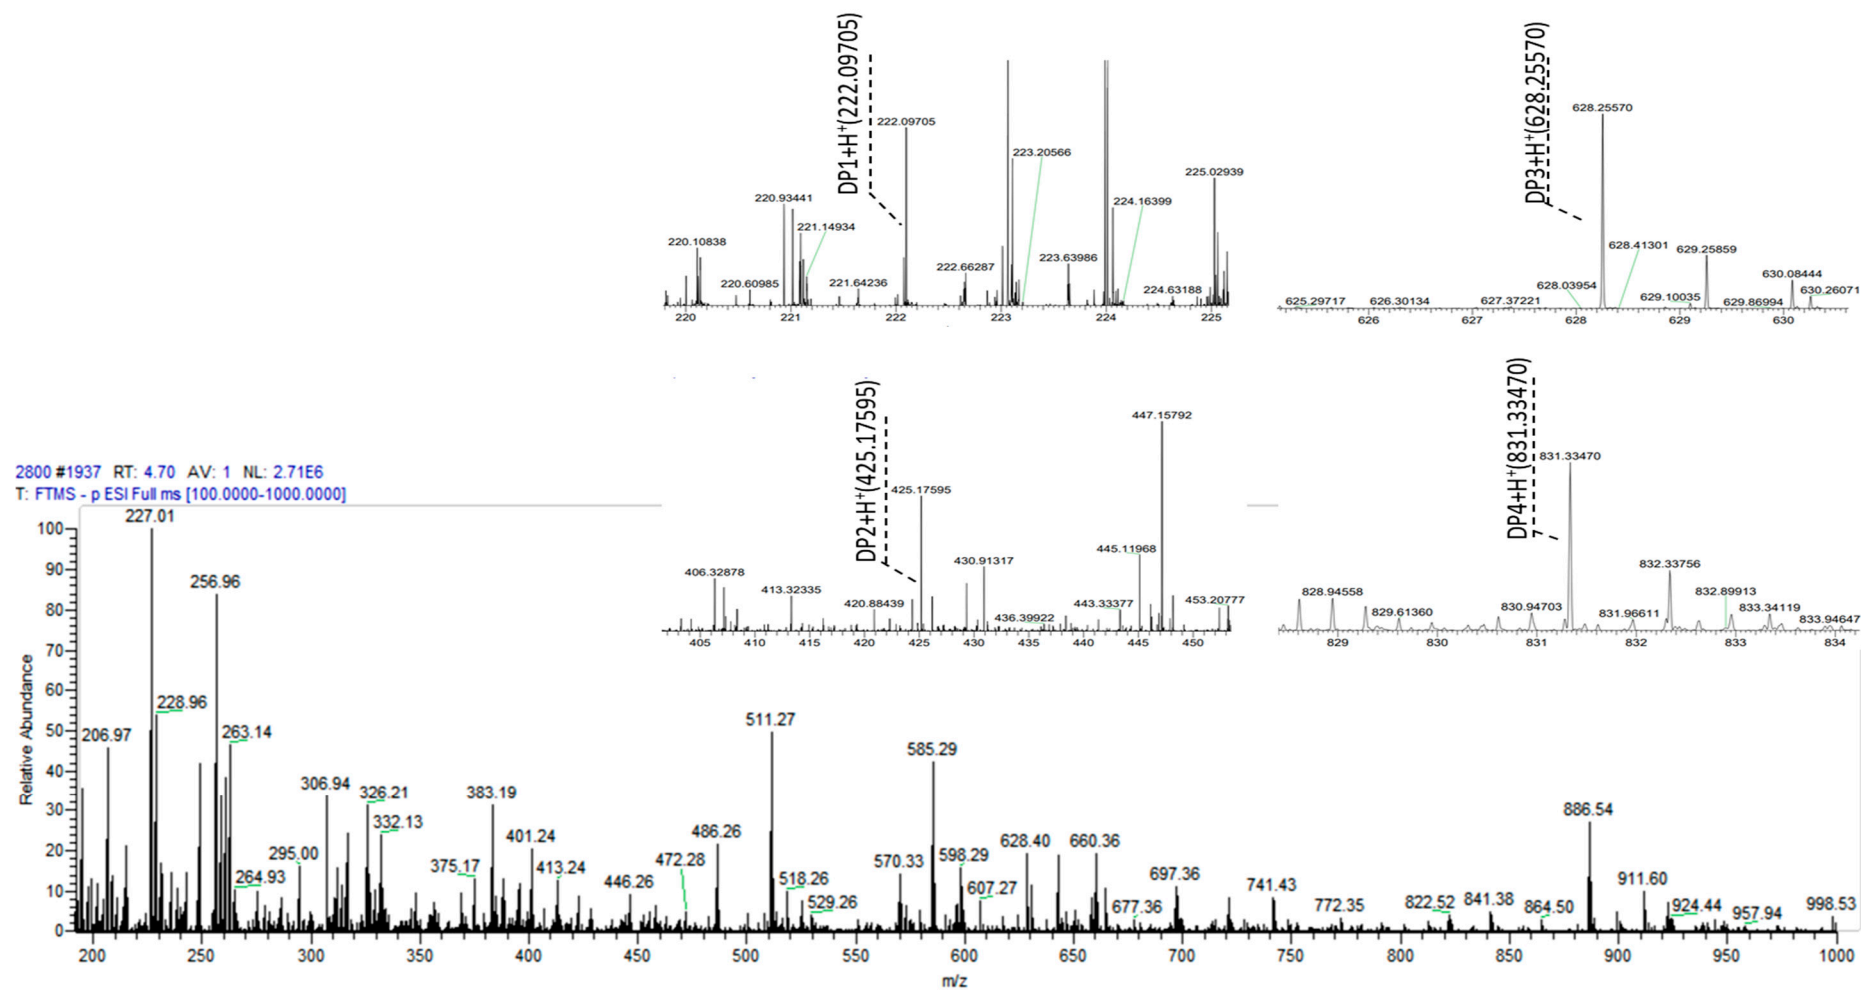

Figure S6. The degree of polymerization of the hydrolysis products after 6 h of reaction of *A/Chi28* with colloidal chitin were analyzed by Q Exactive LC-MS.

**Table S1.** Kinetic parameters of *AfChi28* towards colloidal chitin.

| Parameters                               | <i>AfChi28</i> |
|------------------------------------------|----------------|
| $K_m(\text{mg/mL})$                      | 2.003±0.01     |
| $K_{cat}(\text{s}^{-1})$                 | 0.0093         |
| $K_{cat}/K_m(\text{mL/s}\cdot\text{mg})$ | 0.0349         |
